# Supplementary material
Source: bioRxiv or medRxiv preprint supplement (https://www.biorxiv.org/highwire/filestream/134117/field_highwire_adjunct_files/1/444521-10.pdf)

Wetted Condition

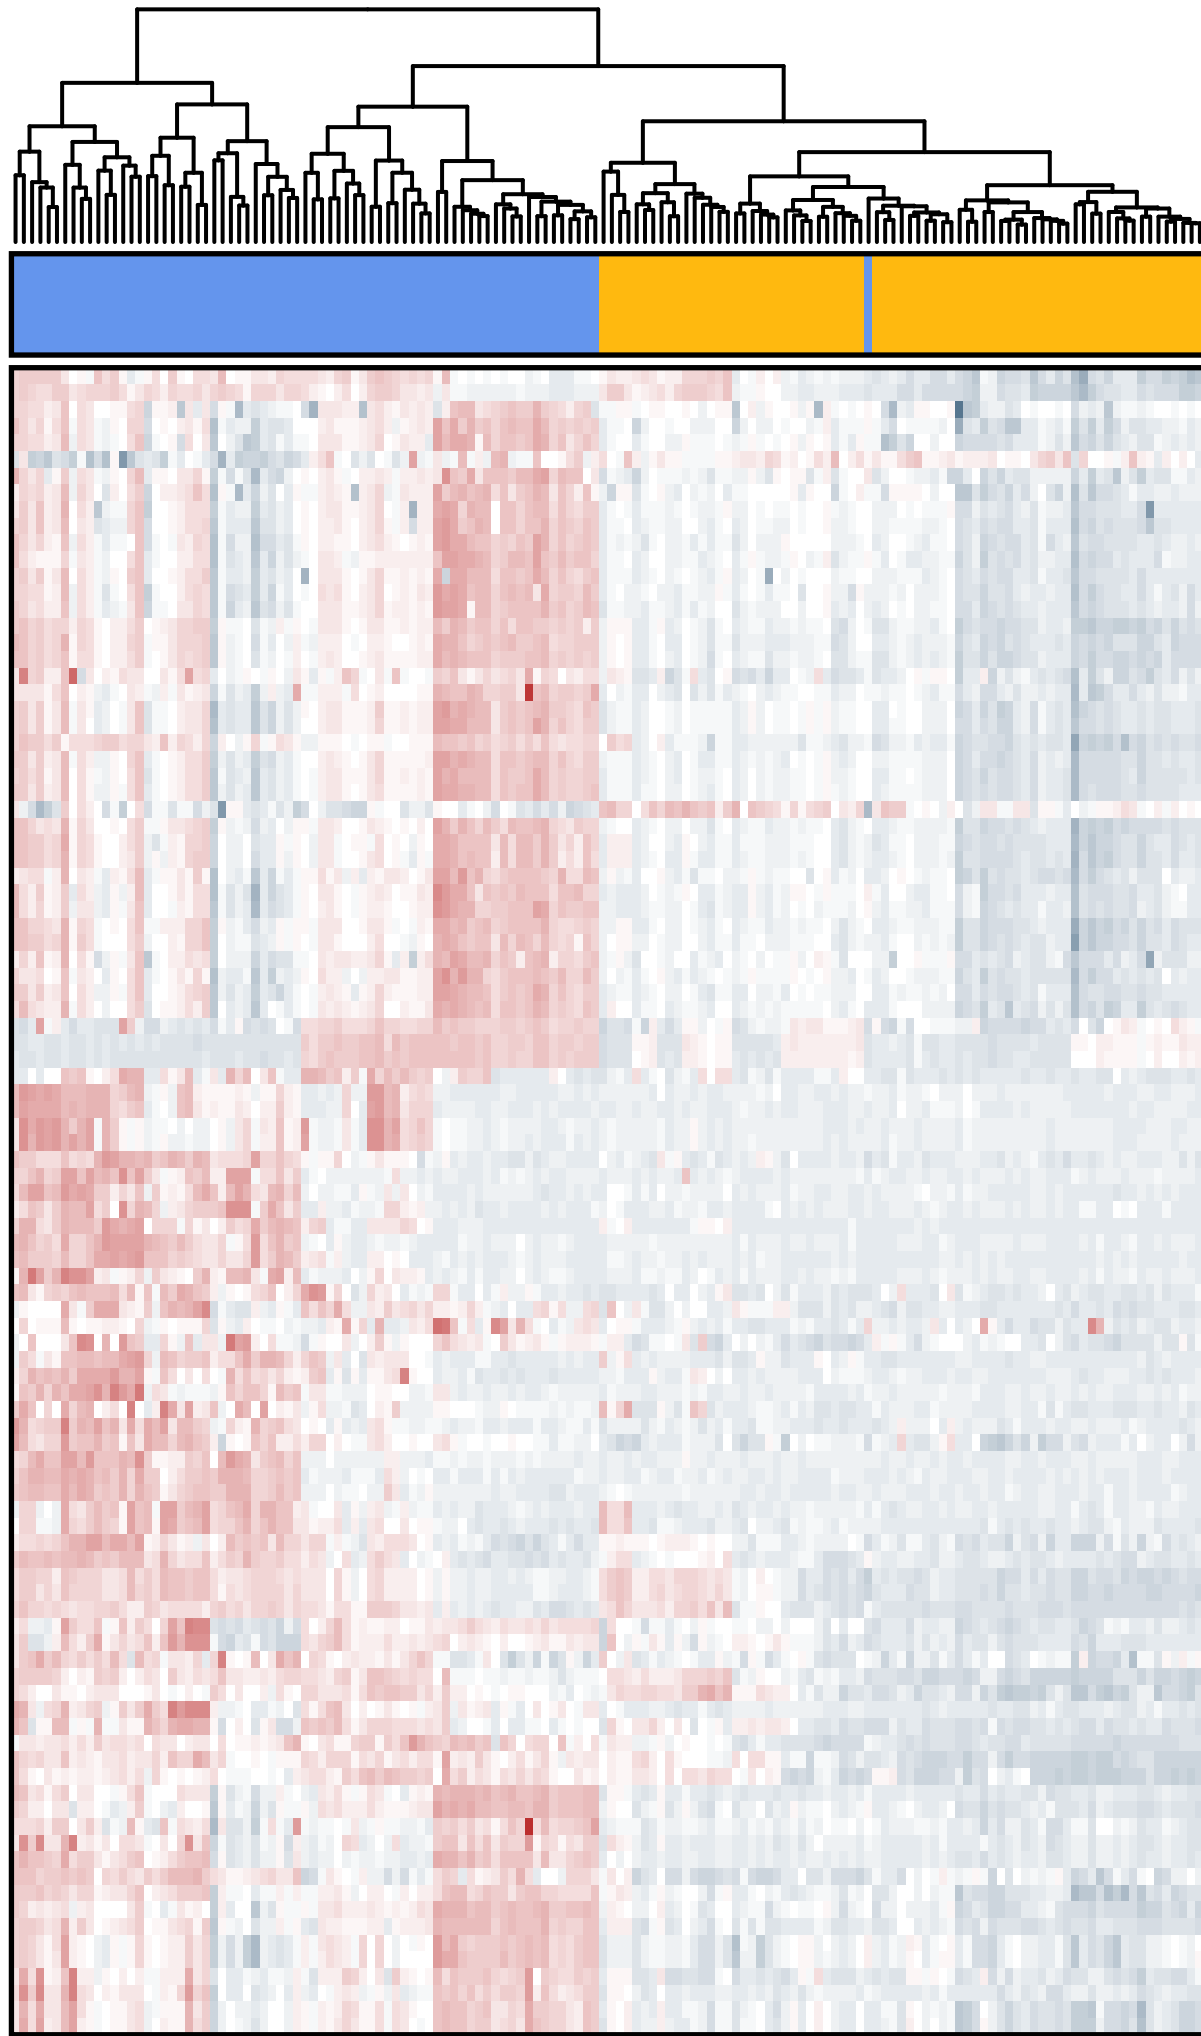

Material

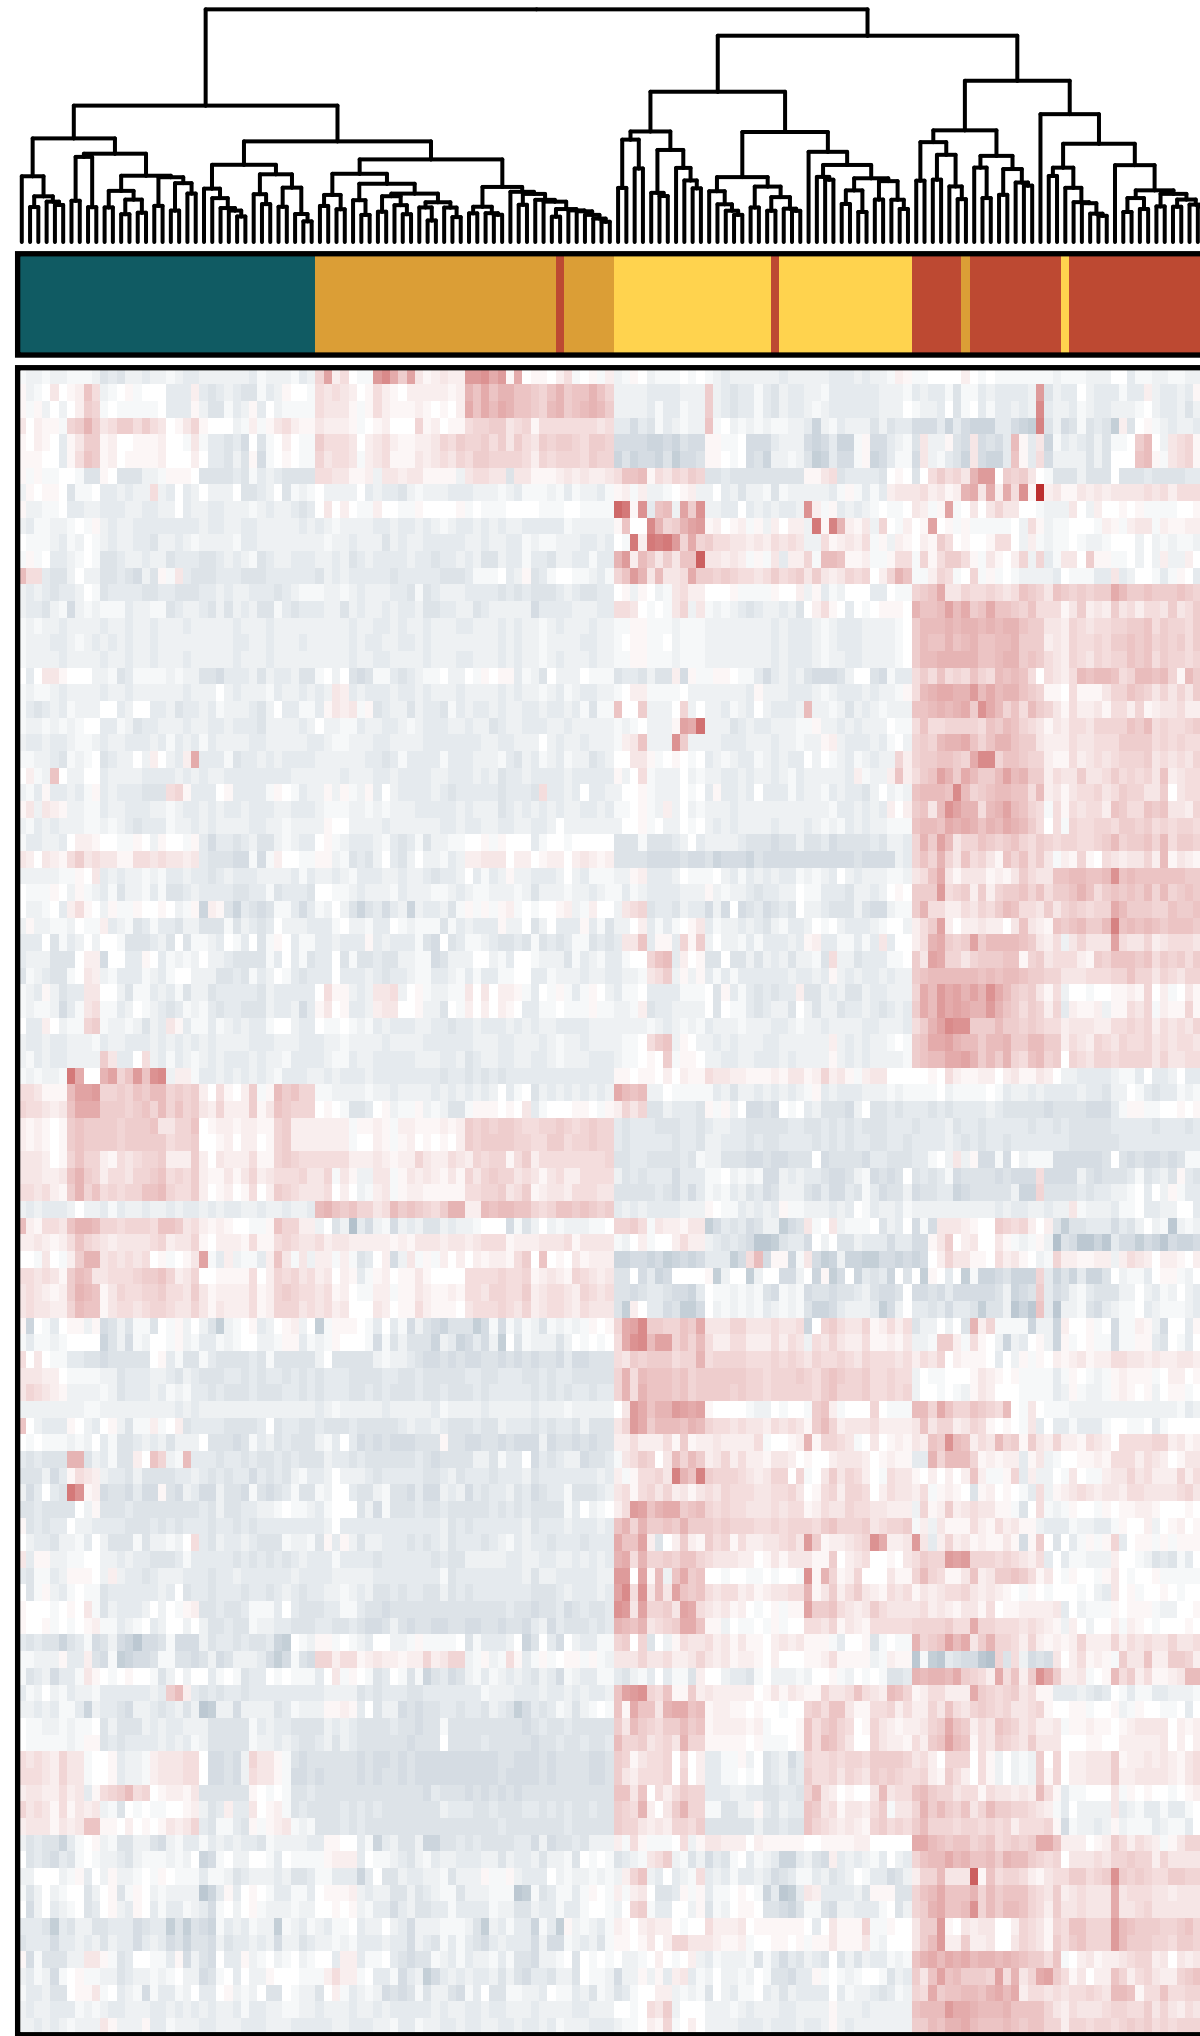

Location

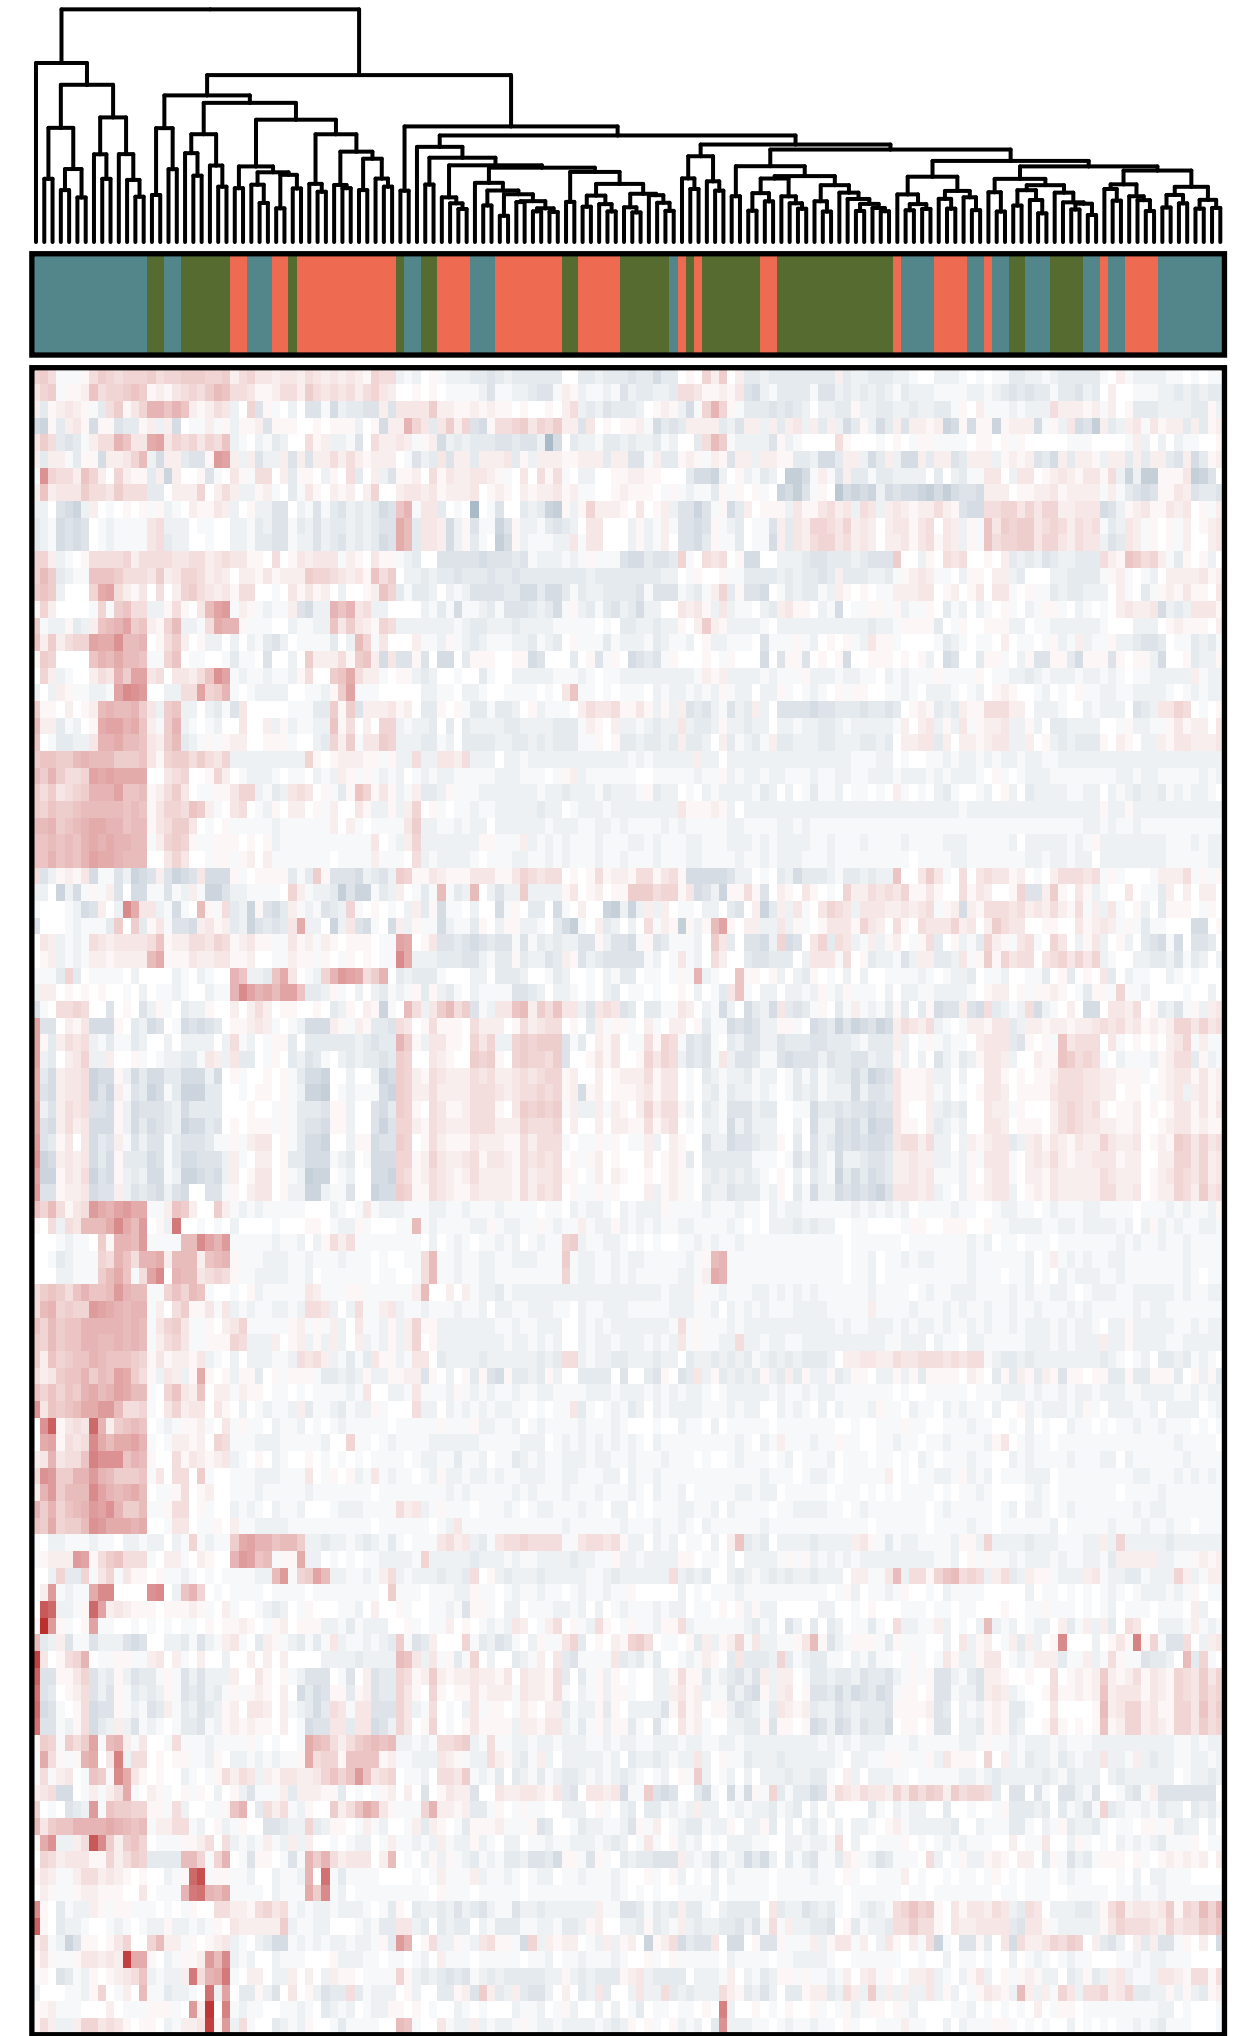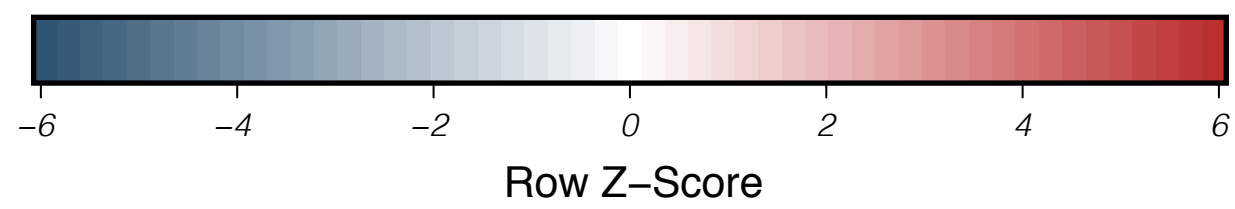

Supplement: Supplementary file [file 444521-10.pdf]
